# Supplementary material
Source: PubMed Central journal article supplement (PMC3547672)
Supplement: NIHMS389036-supplement-01.pdf [file NIHMS389036-supplement-01.pdf]

# Insights from molecular dynamics: the binding site of cocaine in the dopamine transporter and permeation pathways of substrates in the leucine and dopamine transporters

Bonnie A. Merchant and Jeffry D. Madura

Department of Chemistry and Biochemistry and Center for Computational Sciences, Duquesne University, 600 Forbes Avenue, Pittsburgh, PA 15282

April 24, 2012

Supporting Information

| <b>M1</b> | <b>M2</b> | <b>M3</b> | <b>M4</b> |
|-----------|-----------|-----------|-----------|
| 1R5       | 1N21      | 1F76      | 1W84      |
| 1A22      | 1A22      | 1D79      | 1Y88      |
| 1G24      | 1G26      | 1W84      | 1Y91      |
| 1G26      | 1R30      | 1R85      | 6F319     |
| 1N27      | 1G37      | 1Y88      | 10D475    |
| 1L29      | il1H74    | 3V145     |           |
| 1R30      | il1T76    | 3V152     |           |
| 2A65      | il1T77    | 6F319     |           |
| 2G73      | 3Y108     | 6G326     |           |
| 2G75      | 6F253     | 6V327     |           |
| 3Y108     | 6T254     | el4D380   |           |
| el3G221   | 6S256     | el4D384   |           |
| el3D225   | 6Y268     | el4G385   |           |
| 6F253     | el4K316   | 8G425     |           |
| 6T254     | 8D369     | 8E436     |           |
| 6S256     | 10D404    | 10D475    |           |
| 6S267     | 10G408    |           |           |
| 7E290     |           |           |           |
| 7L293     |           |           |           |
| 7I297     |           |           |           |
| 7S298     |           |           |           |
| 7A301     |           |           |           |
| 7F305     |           |           |           |
| el4F331   |           |           |           |
| 8S355     |           |           |           |
| 8D369     |           |           |           |
| 10D404    |           |           |           |

Table 1: Residues interacting with the substrate observed during the simulated permeation using the MCTI method are identified by their transmembrane (TM) helix, amino acid and residue number. That is, 1F76 indicates TM 1 phenylalanine 76. Setups are abbreviated by: M1, Leu<sub>TM</sub>:Leu (Vacuum); M2, Leu<sub>TM</sub>:Leu (Water Sphere); M3, DAT:DA (Vacuum); M4, DAT:COC (Vacuum).

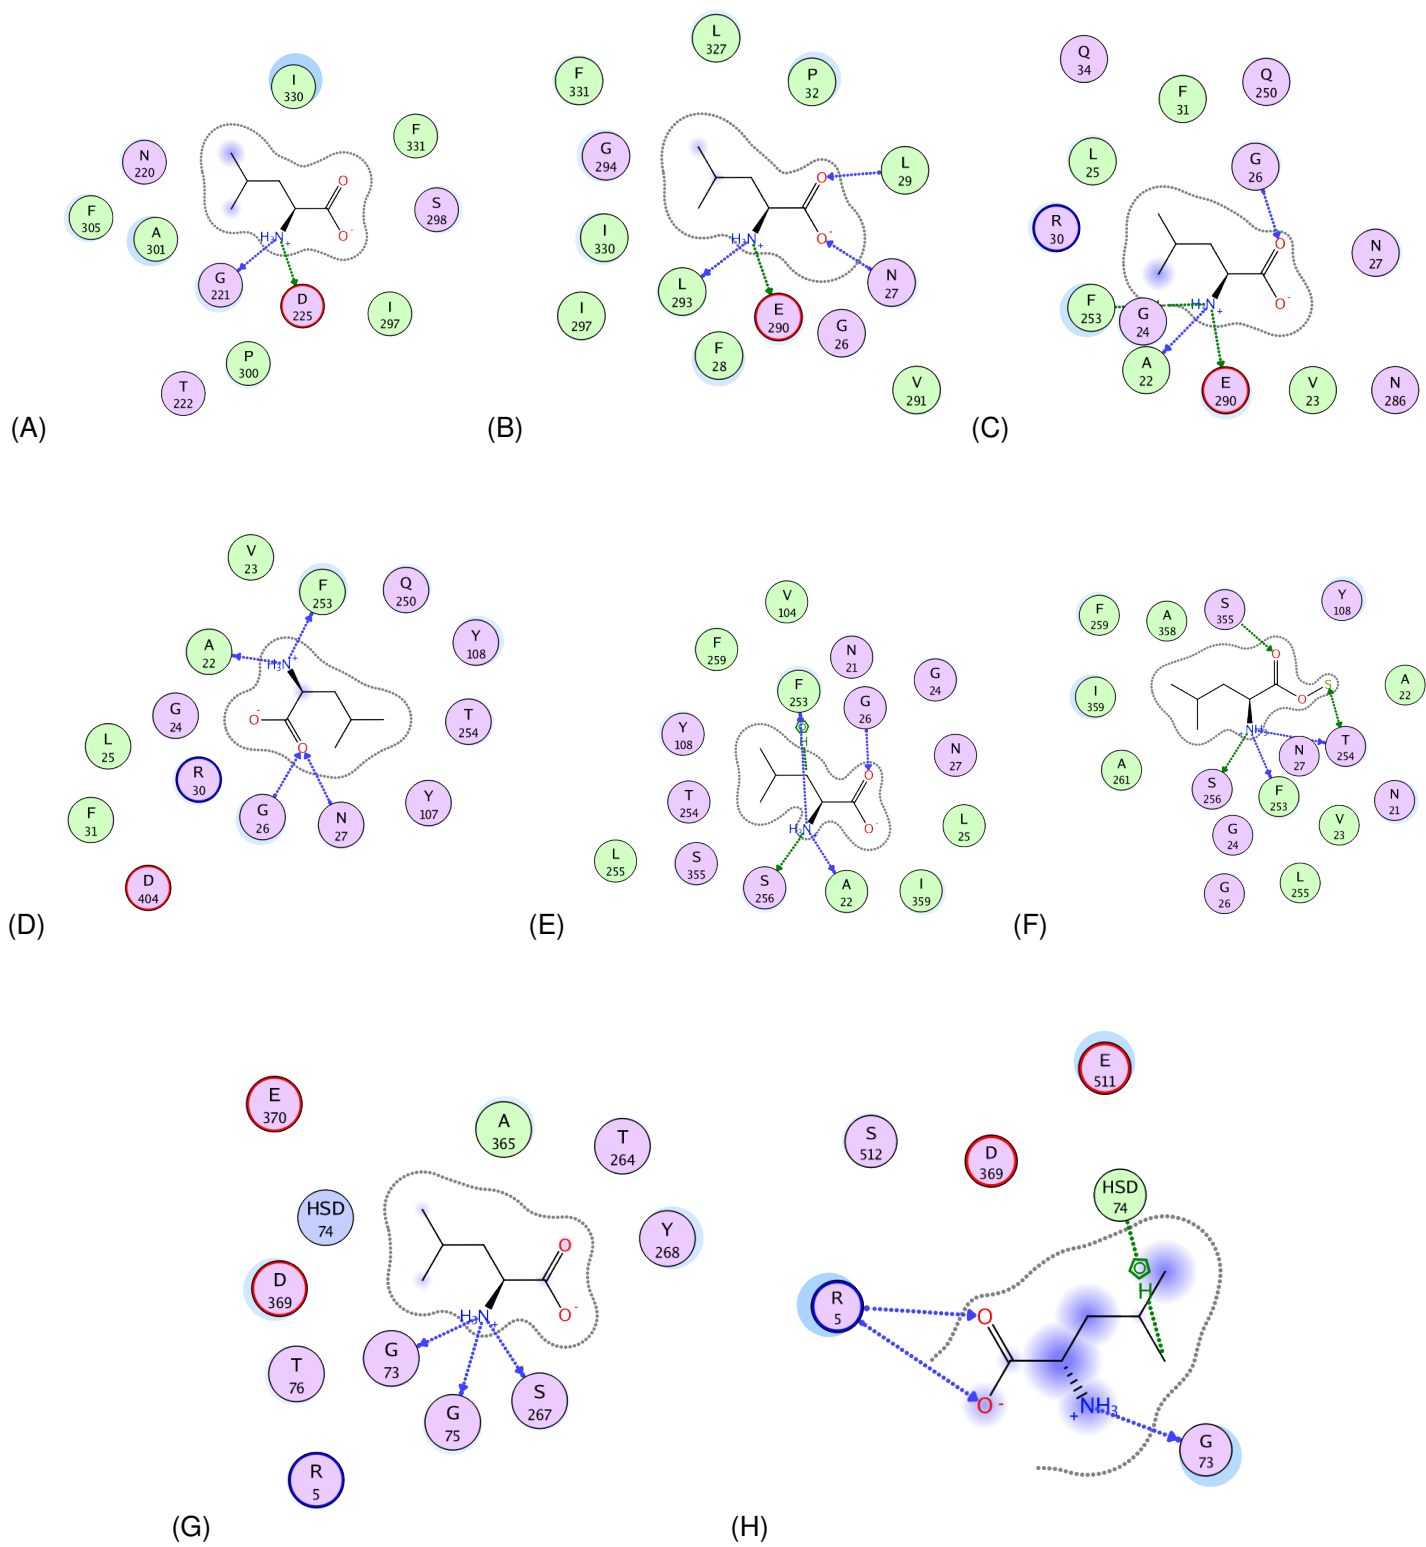

Figure 1: LEUT:LEU (in vacuum) stop over sites. 2D Interaction Plots generated using MOE 2009.10.

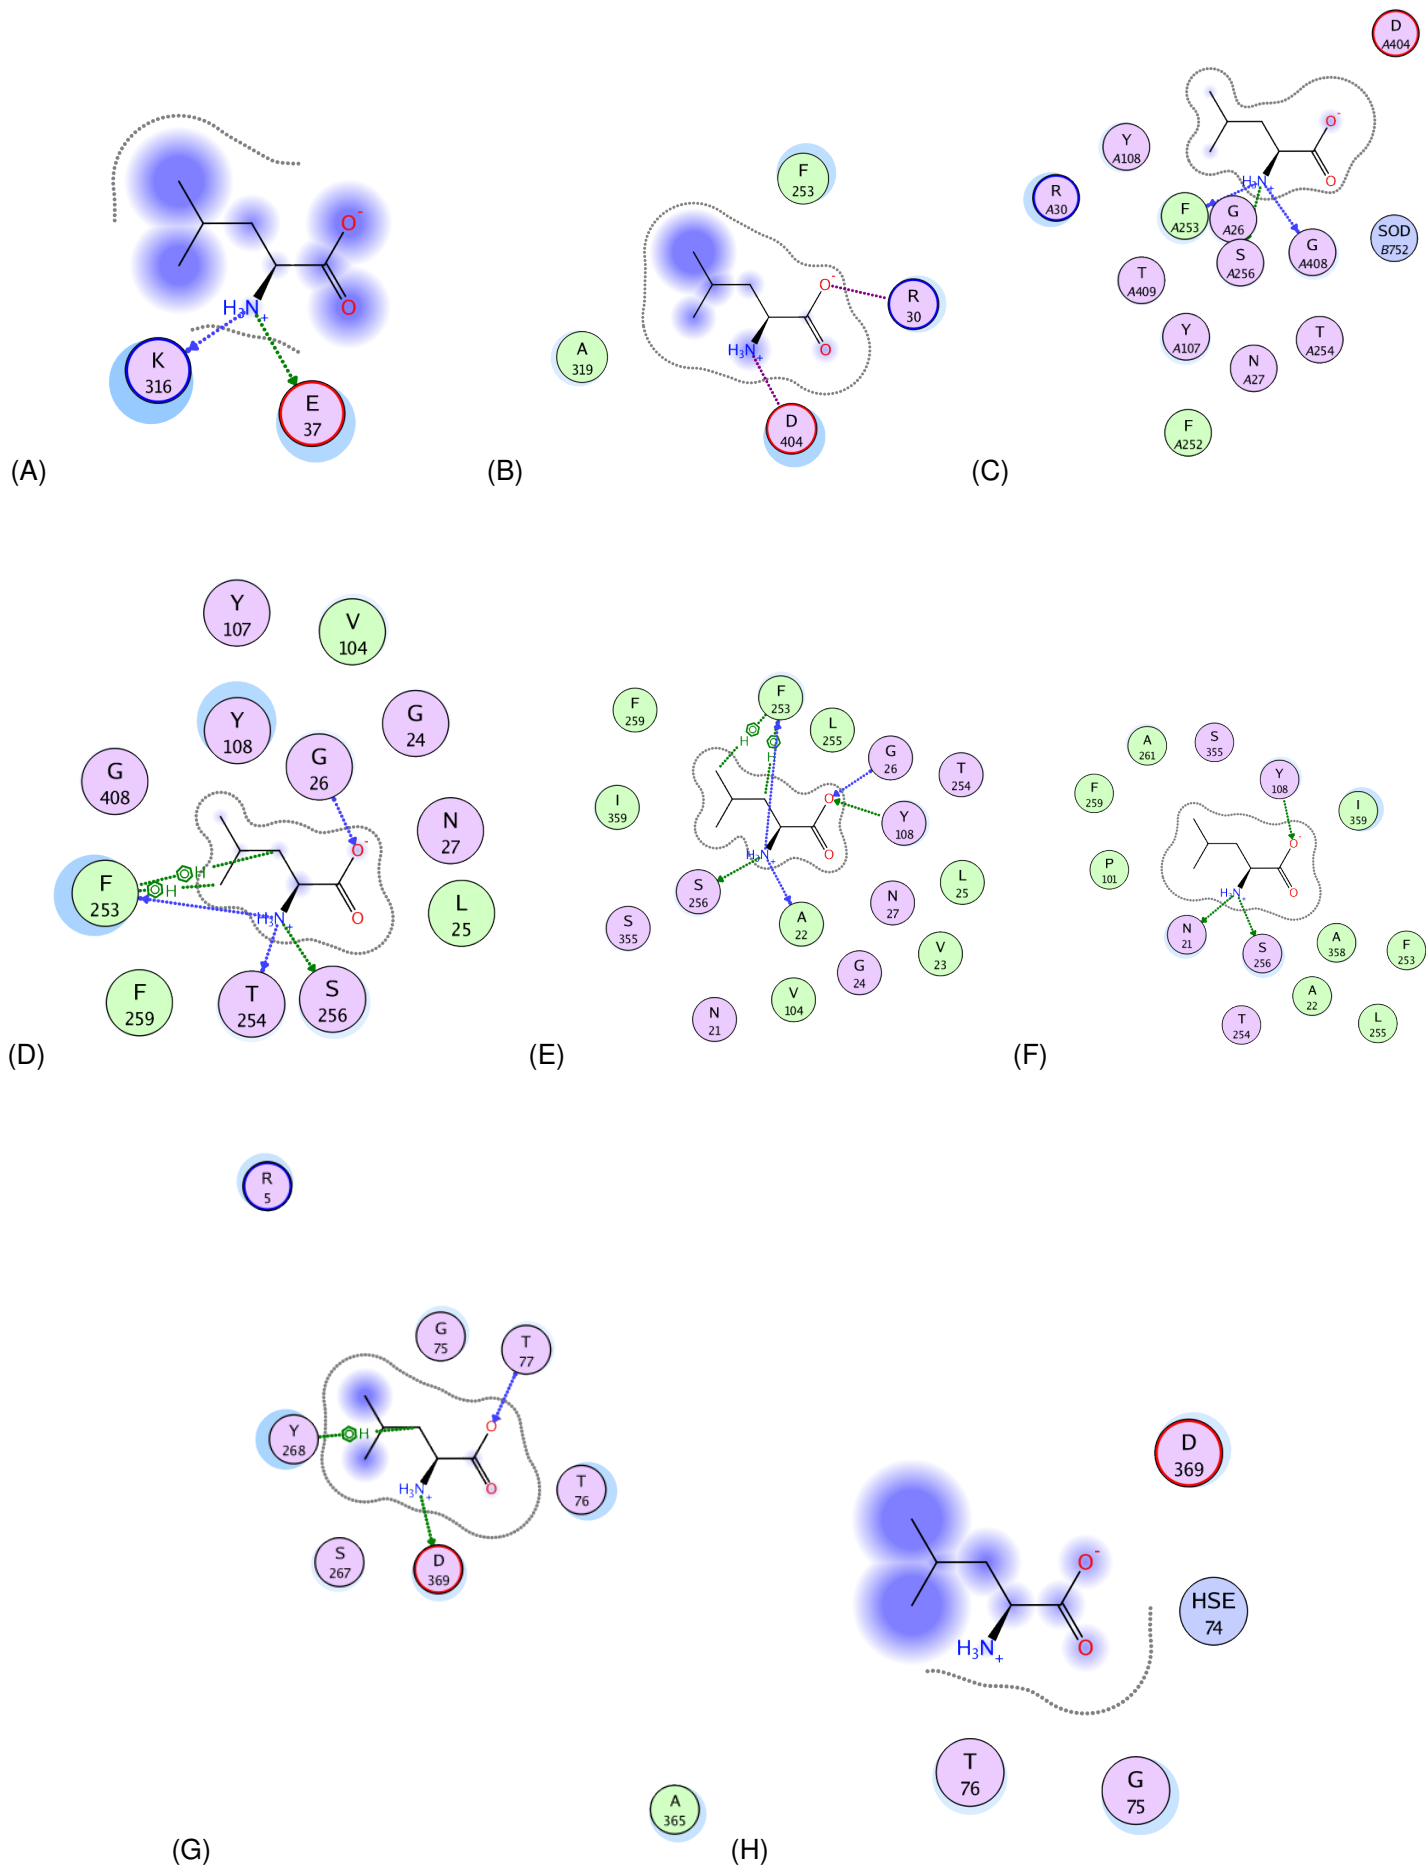

Figure 2: LEUT:LEU (in a water sphere) stop over sites. 2D Interaction Plots generated using MOE 2009.10.

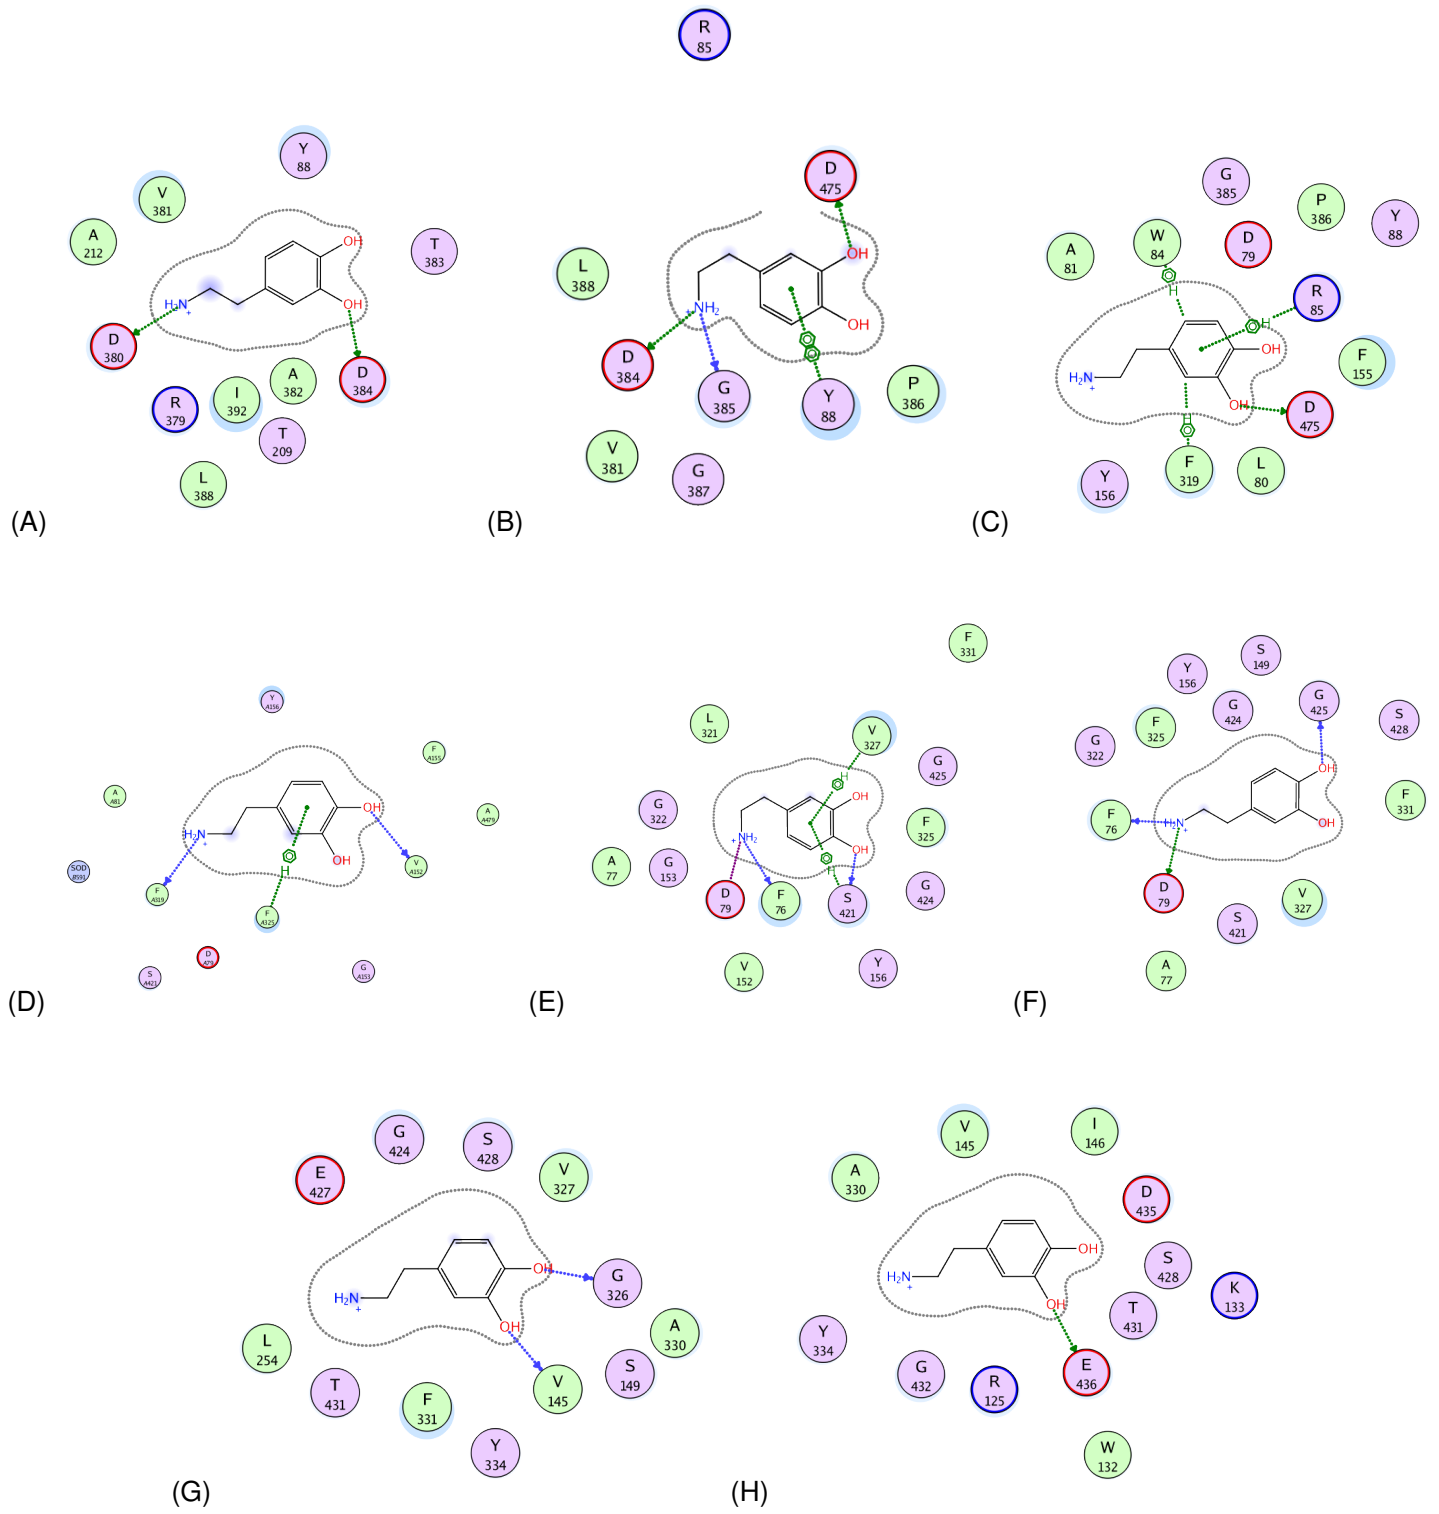

Figure 3: DAT:DA (in vacuum) stop over sites. 2D Interaction Plots generated using MOE 2009.10.



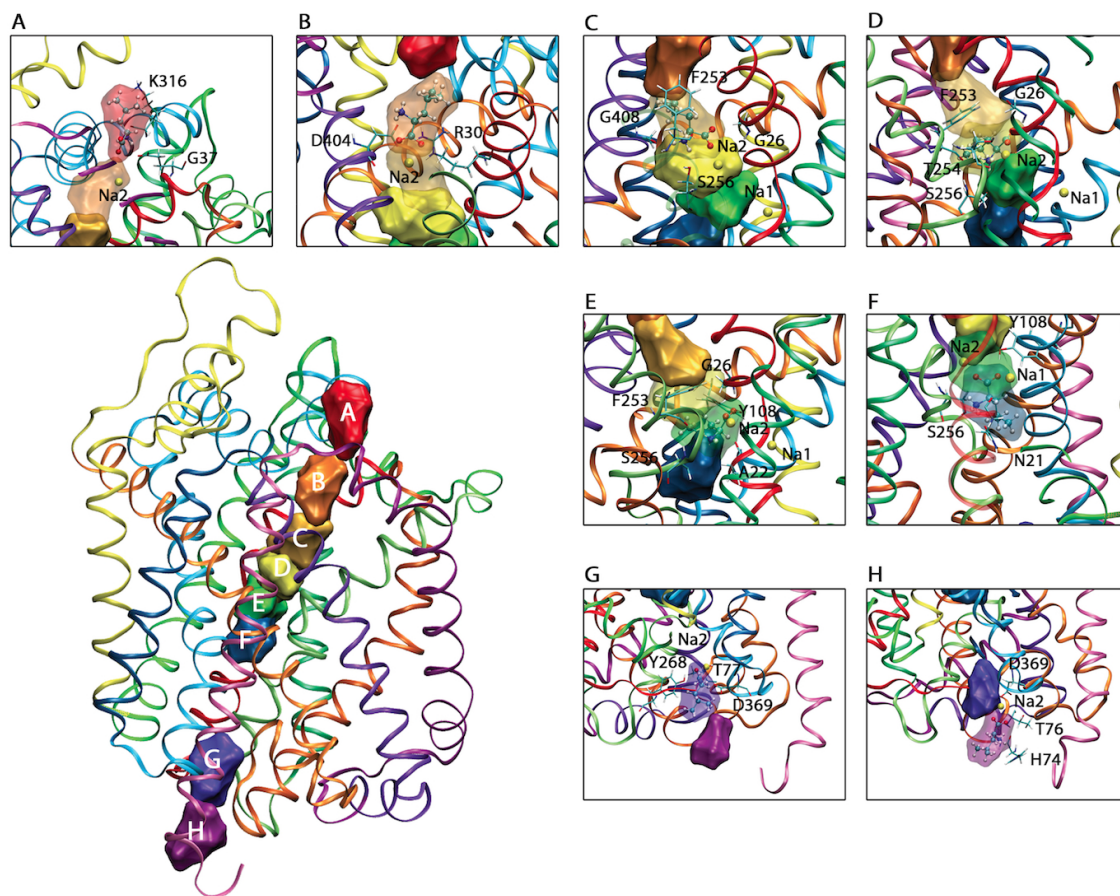

Figure 5: MCTI stop-over sites identified for *leucine* in *LeuT*, *vacuum environment*. Stop-over sites are labeled A-H, represented by a surface representation of the substrate at that particular site, with a 3.5 Å probe radius. The insets show a close up view of each site. The substrate, leucine is presented in a ball and stick representation, with the surface representation changed to transparent for clarity. (In some insets, nearby pockets are changed to transparent for added clarity and to highlight proximity and overlaps of the stop-over sites.) Key residues at each site are identified and labeled, drawn in a stick model. Note, site “E” is the primary (S1) substrate pocket while site “C” represents the secondary (S2) pocket of LeuT.

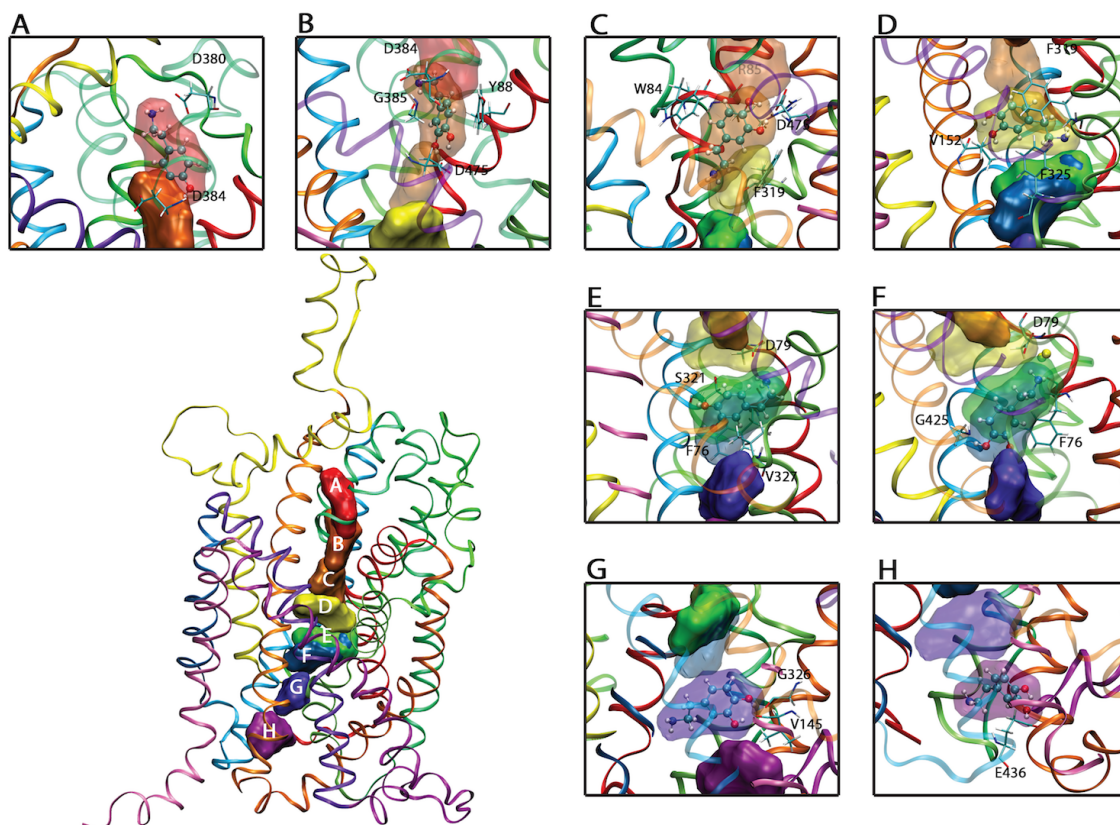

Figure 6: MCTI stop-over sites identified for *dopamine* in *DAT*, *vacuum environment*. Stop-over sites are labeled A-H, represented by a surface representation of the substrate at that particular site, with a 3.5 Å probe radius. The insets show a close up view of each site. The substrate, dopamine is presented in a ball and stick representation, with the surface representation changed to transparent for clarity. (In some insets, nearby pockets are changed to transparent for added clarity and to highlight proximity and overlaps of the stop-over sites.) Key residues at each site are identified and labeled, drawn in a stick model. Note that site “E” is the primary (S1) substrate pocket while site “D” represents the secondary (S2) pocket in *DAT*.



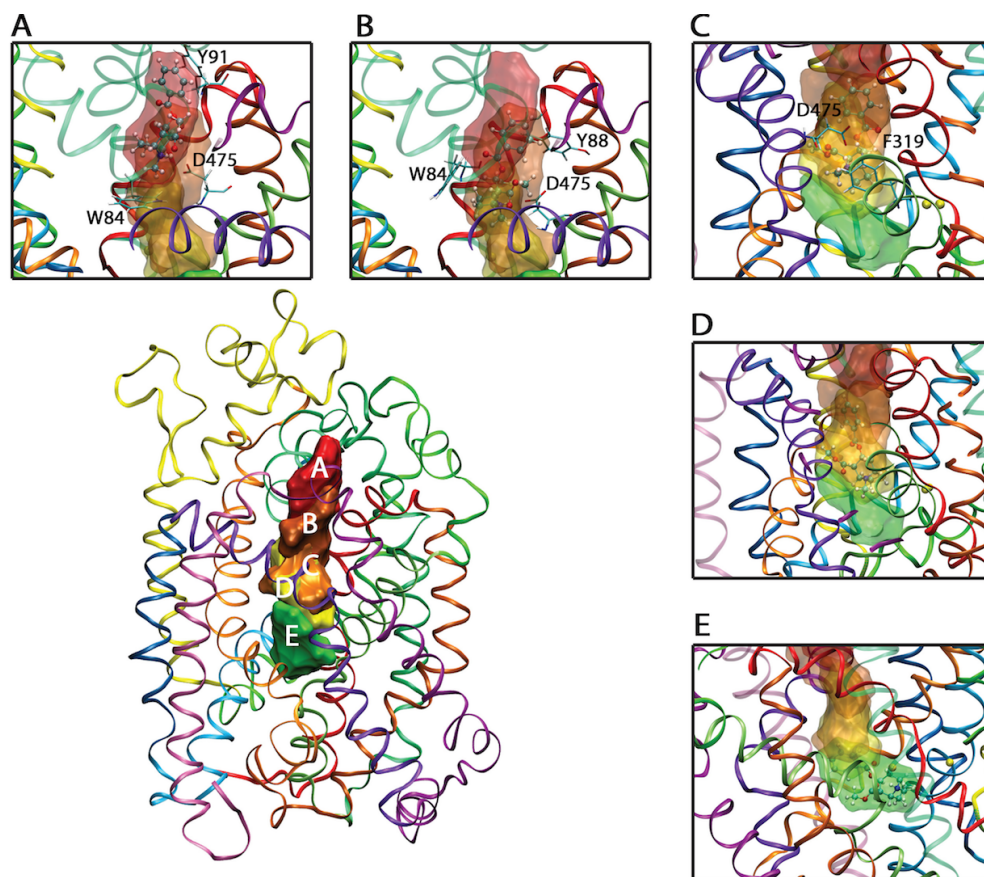

Figure 7: MCTI stop-over sites identified for *cocaine in DAT, vacuum environment*. Stop-over sites are labeled A-H, represented by a surface representation of the substrate at that particular site, with a 3.5 Å probe radius. The insets show a close up view of each site. The substrate, cocaine is presented in a ball and stick representation, with the surface representation changed to transparent for clarity. (In some insets, nearby pockets are changed to transparent for added clarity and to highlight proximity and overlaps of the stop-over sites.) Key residues at each site are identified and labeled, drawn in a stick model. Note that site “E” is the primary (S1) substrate pocket while site “D” represents the secondary (S2) pocket in DAT.

| Setup | Path | Sodium? | # Times | Residues                                                                                                                                                                                                                   |
|-------|------|---------|---------|----------------------------------------------------------------------------------------------------------------------------------------------------------------------------------------------------------------------------|
| R1    | E1   | No      | 7       | 1N21, 1A22, 1G26, (1R30), 3Y108, 6T254, 6S256, 8S355, (8S356), (10D404)                                                                                                                                                    |
|       | I1   | Yes     | 14      | 1N21, 1A22, 1G26, (i11G73), (i11G75), i11T77, (3P101), 3Y108, 6F253, 6T254, 6S256, (6F259), 6G260, 6A261, 6T264, 8S355, 8A358, (8I359), (8E370), (12F496), 12L500, (12V501), (12E505), (12R508), (12N509)                  |
|       | I2   | No      | 14      | 1R5, 1N21, 1A22, 1G26, (2G69), (2G70), (i11Q72), (i11G73), (i11H74), (i11G75), (i11T77), 3Y108, 6F253, 6T254, 6S256, 6F259, 6G260, (6A261), 6T264, 6S267, 6Y268, 8S355, 8A358, 8Q361, (8D369), (8E370), (12F497), (12V504) |
| R2    | I1   | Yes     | 8       | 1N21, 1A22, (2M59), 2E62, 2W63, (2G66), 6T254, 6L255, 6S256, (6A266), (6V269), (6K271), (7Q273), 7D274, (7I275), (7S278), 8S355, (i15E435)                                                                                 |
|       | I2   | No      | 9       | 1N21, 1A22, (1G24), (2E62), 2W63, (2A64), (2R67), (3Y108), 6T254, 6L255, 6S256, (6A261), (6I262), (6I263), (6T264), (6A266), (6Y268), (6R270), 7Q273, (7N286), (7E290), 8S355                                              |
| R3    | I1   | Yes     | 31      | (1R5), 1N21, 1A22, 1G24, 1G26, 1N27, i11G73, i11H74, 3Y108, 6F253, 6T254, 6S256, 6F259, 6A261, 6T264, 6Y265, 6Y268, (7N286), 8S355                                                                                         |
| R4    | I1   | Yes     | 9       | 1N21, 1A22, (1V23), (1G24), 1G26, (i11H74), (i11G75), (i11T77), 3Y108, 6F253, 6T254, 6S256, (6A261), 6T264, 8S355, (8D369)                                                                                                 |
| R5    | I2   | No      | 23      | 1N21, 1A22, (1L25), 1G26, i11G73, i11G75, i11T76, (i11T77), 3Y108, 6F253, 6T254, 6S256, 6F259, (6G260), (6A261), 6T264, 6Y265, 8S355, (8A358), (8P362), 8E368, (8D369)                                                     |
|       | I1   | Yes     | 24      | (1M18), 1N21, 2W63, 6T254, 6S256, (6A261), (6Y265), 6R270, 6F259, (6G260), (6A261), 6T264, 6Y265, 8S355, (8A358), (8P362), 8E368, (8D369)                                                                                  |
|       | I2   | No      | 18      | (1R11), 1A21, (1W63), (3Y108), 6T254, 6S256, 6R270, 7Q273, 8S355                                                                                                                                                           |

Table 2: Observed residues interacting via hydrogen bonding for each pathway cluster of LEUT RAMD simulations. We denote the transmembrane (TM) helix the residue belongs to i.e., 1N21 specifies the N21 residue, belonging to TM1. Clusters are identified as intracellular (I) or extracellular (E), followed by a number denoting a specific pathway. Observation of sodium movement with the substrate is also indicated, as well as how many paths belong to the cluster. Residues observed to participate only once in a hydrogen bond pair with the ligand of interest are denoted by placing them inside a set of parenthesis.

| Setup | Path | Sodium? | # Times         | Residues                                                                                                                                                                                                                 |
|-------|------|---------|-----------------|--------------------------------------------------------------------------------------------------------------------------------------------------------------------------------------------------------------------------|
| R6    | E1   | No      | 4               | 1F76, 1D79, (1R85), 3S149, 6F319, 6L321, (6G322), (6F325), (eI4T383), (8S421), (8G425), 10D475                                                                                                                           |
|       | E2   | No      | 10              | 1F76, 1D79, (1W84), 1R85, (1Y88), 1I48, 3S149, 3Y156, 6F319, (6S320), 6L321, 6G322, 6F325, (7N352), (eI4V381), eI4A382, (eI4T383), (eI4D384), (eI4G385), 8S421, (10L474), 10D475, (10A478)                               |
| R7    | I1   | No      | 15              | 1F76, 1D79, (2E126), iI1G127, iI1A128, (iI1A129), (iI1V131), (3V141), (3T144), (3V145), 3S149, 3Y156, 6F319, 6L321, 6G322, (6G324), 6F325, (6A330), (6S333), 8S421, 8G425, (8E436), (10D475), (10A478), 10E490, (12T576) |
|       | I2   | No      | 7               | 1S72, (1V73), 1F76, 1D79, 3S149, 3Y156, 6F319, (6S320), 6L321, 6G322, 6F325, (6V327), (6L328), (6F331), (7N352), (8G424), 8S428                                                                                          |
| R8    | I3   | No      | 2               | 1K66, 1F76, 1D79, (1R85), 3S149, 3Y156, 6F319, 6L321, (7N340), (7D344), (8G425), (10D475)                                                                                                                                |
|       | I4   | No      | 3               | 1F76, 1D79, (1Y88), (2E126), (iI1A128), (iI1G130), (iI1W132), 3S149, (3Y156), 6F319, (6L321), (6F325), (6G326), (8S421), 8G425, (8S428), (8G432), (12T576), (12F579)                                                     |
| R9    | E1   | No      | 44              | (1V73), (1F76), (1A77), 1D79, 1W84, (1Y88), 3V152, (3F155), 3Y156, 6F319, 6V327, (eI4D380), (eI4V381), eI4A382, eI4T383, eI4D384, eI4G385, (eI4P386), 8S421, (8G424), (8S428), (10I468), 10F471, 10T472, 10D475          |
|       | E1   | No      | 34 <sup>†</sup> | 1W84, 1R85, eI4D384, eI4G385, eI4P386, (eI4I389), (10Y469), (10T472), 10D475                                                                                                                                             |
| R10   | E1   | No      | 16              | 1F76, (1A77), 1D79, (1Y88), 3I148, 3S149, 3Y156, 6F319, 6L321, (6G322), 6F325, (eI4A382), eI4T383, (eI4G385), 8D420, 8S421, 8G425, (10F471), 10T472, (10L474), 10D475                                                    |
|       | I1   | No      | 3               | (1W63), (1V73), 1F76, 1D79, 3S149, 3Y156, 6F319, (6S320), 6L321, (6F325), 8S421, (8S428)                                                                                                                                 |
| R11   | I2   | No      | 3               | (1K66), 1F76, (1A77), 1D79, 3S149, (3V152), 3Y156, (6C318), 6F319, 6L321, (6G322), 7N339, (7N340), 7D344, 7T348, 8S421, (8G424), 8G425, (8S428), (8V429)                                                                 |
|       | I3   | No      | 3               | 1F76, 1D79, (iI1W132), 3S149, 6F319, 6F325, 8G425, (8E436), (12T576)                                                                                                                                                     |
| R10   | I4   | No      | 4               | 1F76, 1D79, 3S149, 3Y156, 6F319, (6L321), (6G322), 6F325, 6V327, 8S421, (8A422), (8G425), (8G432), (8D435), 8E436                                                                                                        |
|       | E1   | No      | 9               | 1F76, 1D79, 1R85, 3I148, 3S149, 3Y151, (3V152), 3Y156, 6F319, (6S320), eI4T383, (eI4D384), (8G418), 8S421, (8A422), (8G425), (8M426), 9A442, (10L474), 10D475, 10A478, (10A479)                                          |
| R11   | E2   | No      | 12              | 1F76, (1A77), 1D79, (1A81), 1R85, (1Y88), (1K92), 3I148, 3S149, (3V152), 3Y156, 6F319, (6S320), 6L321, 6F325, (eI4V381), eI4A382, 8S421, (8A422), (8G425), (8S428), (10L474), 10D475, (10H476), (11H546)                 |
|       | I1   | No      | 8               | (1E61), (1W63), 1D68, 1S72, 1F76, (1A77), 1D79, (3I148), 3S149, (3V152), 3Y156, (5S253), 5L254, (5W255), (5K256), (5G257), (5T260), 6F319, 6S320, 6L321, 7N352, 8D420, 8S421, 8A422, 8G424, 8G425, 8S428                 |
| R11   | E1   | No      | 17              | (1V73), 1F76, 1D79, 1R85, (1Y88), 3I148, 3S149, 3Y156, (4L254), 6F319, 6L321, 6F325, (eI4A382), (eI4G385), (8D420), (8S421), (8S428), (10Y469), (10F471), (10T472), (10L474), 10D475, (10A478)                           |
|       | I1   | No      | 4               | 1F76, 1D79, 3S149, (3Y156), (4L254), 6F319, 6L321, 6V327, (8G424)                                                                                                                                                        |
| R11   | I2   | No      | 7               | 1F76, 1D79, (2R125), iI1A128, iI1W132, (3V145), (3I148), 3S149, 3Y156, 6F319, (6S320), 6L321, 6F325, (6V327), (7D344), (7T348), 8S421, 8G425, 8S428, (8G432), 8E436, (12T576)                                            |

Table 3: Observed residues interacting via hydrogen bonding for each pathway cluster of DAT RAMD simulations. We denote the transmembrane (TM) helix the residue belongs to i.e., 1F76 specifies the F76 residue, belonging to TM1. Clusters are identified as intracellular (I) or extracellular (E), followed by a number denoting a specific pathway. Observation of sodium movement with the substrate is also indicated, as well as how many paths belong to the cluster. Residues observed to participate only once in a hydrogen bond pair with the ligand of interest are denoted by placing them inside a set of parenthesis. † In 16/50 DAT:COG RAMD runs, no hydrogen bonding between the protein and cocaine was observed.
